# Supplementary material for: Epigenetic remodelling of enhancers in response to estrogen deprivation and re-stimulation
Source: PubMed Central journal article supplement (PMC8464064; doi:10.1093/nar/gkab697), 2021-08-17
Supplement: gkab697_supplemental_file.pdf [file gkab697_supplemental_file.pdf]

# Supplementary Figures

**A**

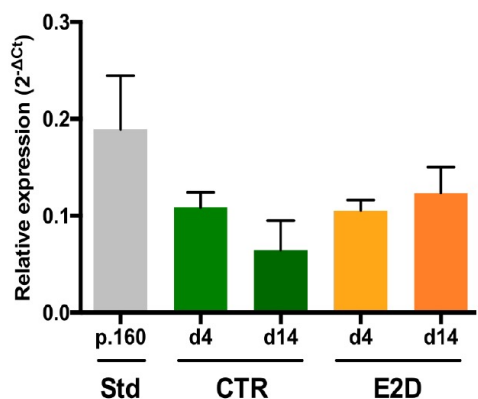

**B**

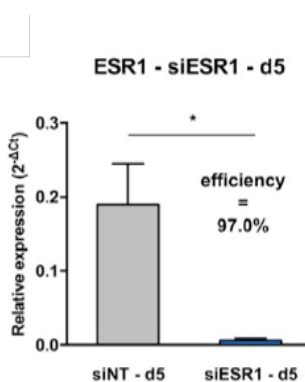

**C**

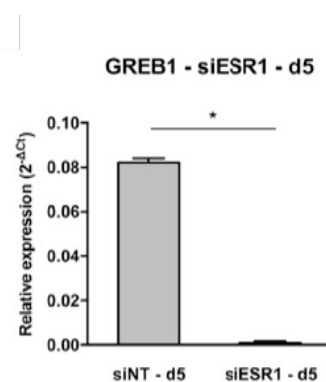

**D**

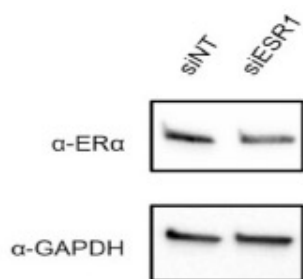

**E**

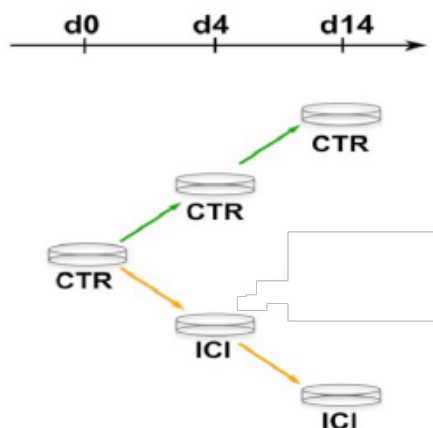

**F**

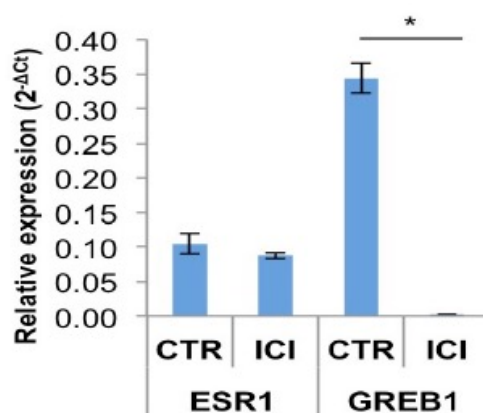

**Supplementary Figure 1.** (A) *ESR1* mRNA expression levels in MCF-7 cells grown in standard medium till passage 160 (Std; phenol-red and complete FBS), in CTR and in E2D. GAPDH was used as an internal control. (n=3). (B) Relative expression of *ESR1* 5 days after transfection with a corresponding siRNA. (C) Effect of si*ESR1* on canonical ER target *GREB1*. Data shown as average ± SD of triplicates and was analysed using a t-test (\* p < 0.05). (D) Protein levels of *ESR1* after 5 days of transfection using a corresponding siRNA. GAPDH is shown for a positive control. (E) MCF-7 cells were treated with 0.1% DMSO (CTR, green) or 1μM of ICI 182,780 (ICI, orange dashed) for 4 and 14 days. (F) Relative expression of *ESR1* and ER-target *GREB1* after 4 days of ICI treatment

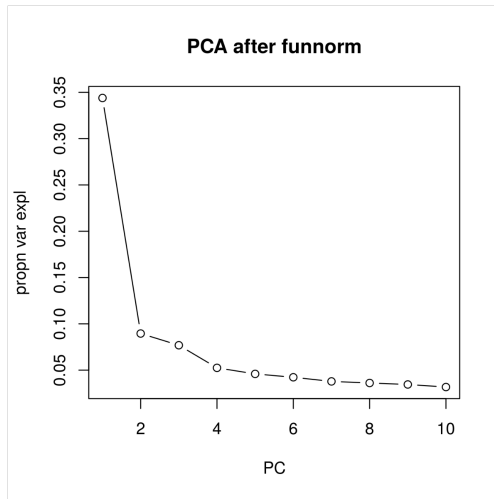

|                          | <b>PC1</b> | <b>PC2</b>   | <b>PC3</b> | <b>PC4</b>   | <b>PC5</b> |
|--------------------------|------------|--------------|------------|--------------|------------|
| <b>sentrix:</b>          | 0.1610.    | 477          | 0.144      | <b>0.018</b> | 0.526      |
| <b>sentrix_position:</b> | 0.297      | 0.576        | 0.752      | 0.931        | 0.243      |
| <b>treatment:</b>        | 0.164      | <b>0.037</b> | 0.170      | 0.054        | 0.743      |
| <b>time:</b>             | 0.395      | <b>0.001</b> | 0.661      | 0.166        | 0.288      |

**Supplementary Figure 2.** Treatment and time are the most significant variables that explain variability of DNAm in response to E2-deprivation after 14 days. Significance of principal components (pvalues) was evaluated with a Wilcoxon ranked test for two-factor variables (sentrix and treatment) and with a Kruskal-Wallis test for multi-factorial variables (sentrix-position and time).

**A**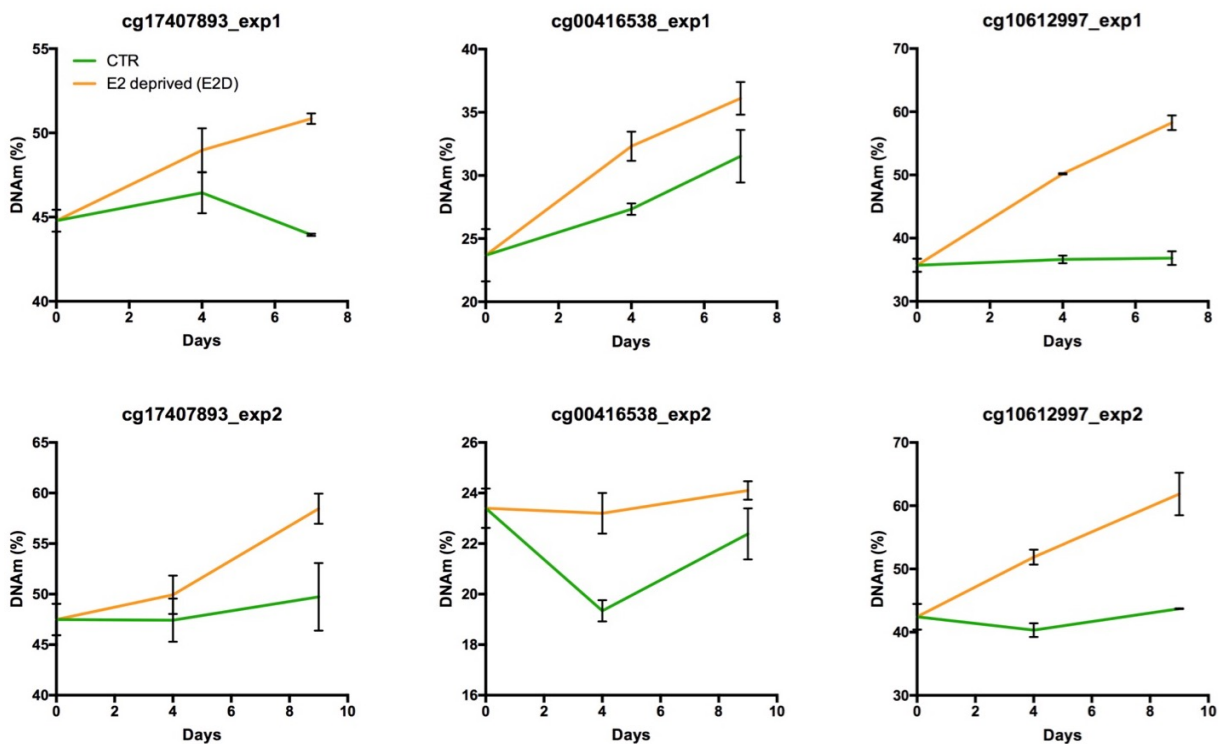**B**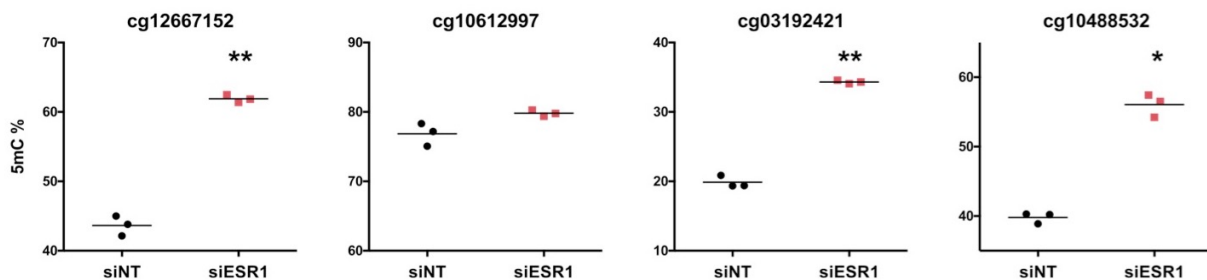

**Supplementary Figure 3. (A)** DNAm levels measured after 7 days (exp1) and 9 days (exp2) of E2 deprivation and **(B)** after 5 days of siRNA targeting ESR1 transcripts. DNAm was measured by pyrosequencing and is shown as average  $\pm$  SD of triplicates. The effect of treatment was evaluated using a Mann-Whitney test.

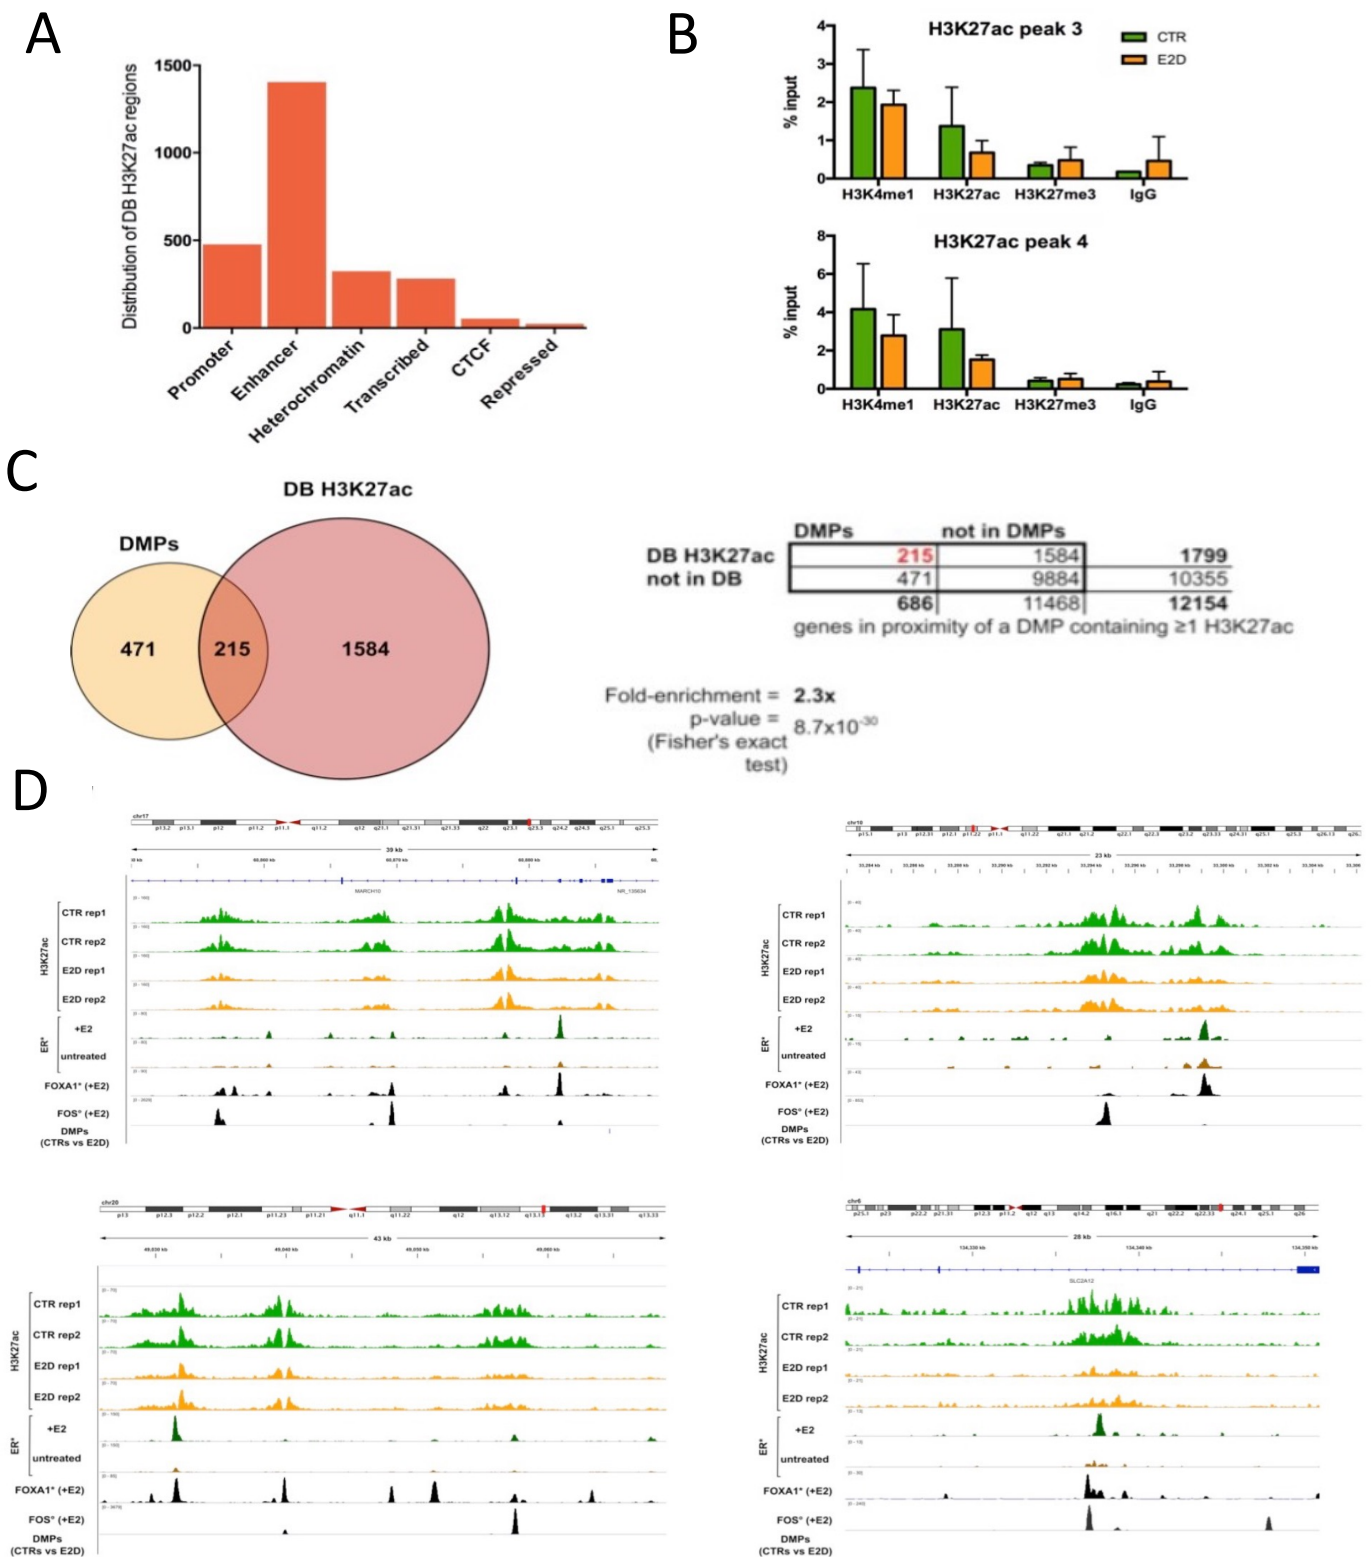

**Supplementary Figure 4. (A)** Overlap of DB H3K27ac regions with ChromHMM annotations coming from MCF-7 cells (Taberlay, 2014). **(B)** Validation of H3K27ac peaks as well as H3K4me1, H3K27me3 marks and IgG after 11 days of CTR and E2D treatments. qPCR data was normalized over input DNA and presented as the average  $\pm$  SD of duplicates. Groups were compared using a Mann-Whitney test within each histone mark. **(C)** Pairwise overlap of genes that map nearby a DMP and a DB H3K27ac peak. Only genes present in both datasets were considered for fold-enrichment. **(D)** Genome browser snapshots of H3K27ac normalised ChIP-seq reads in CTR and E2D conditions, ER and FOXA1 ChIP-seq reads in E2-treated and untreated MCF-7 (\*GSE72249, Swinstead et al., 2016) and FOS ChIP-seq ( $\circ$ GSE105734, ENCODE Project Consortium et al., 2012).

**A**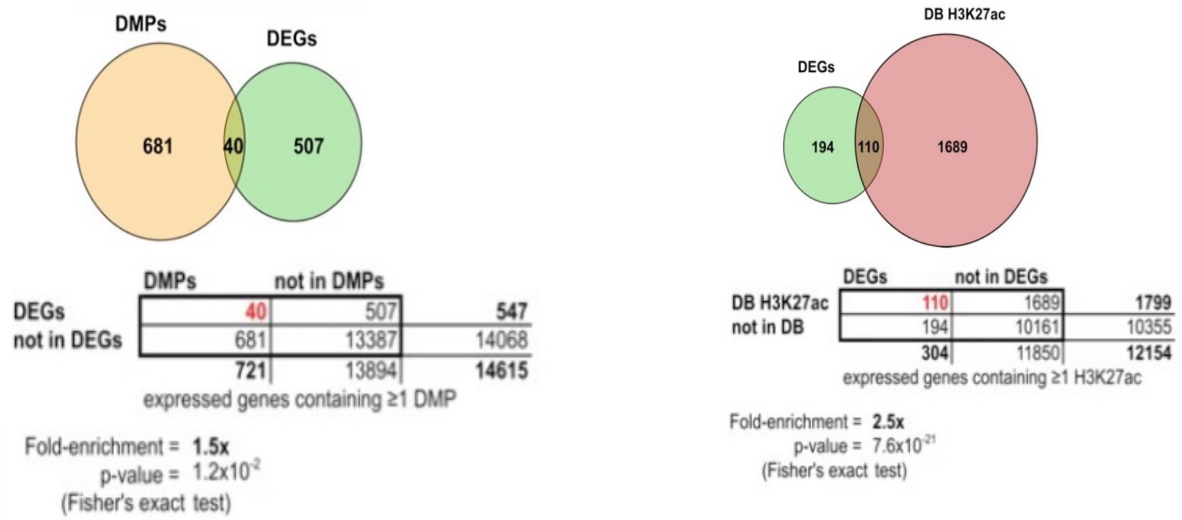**B**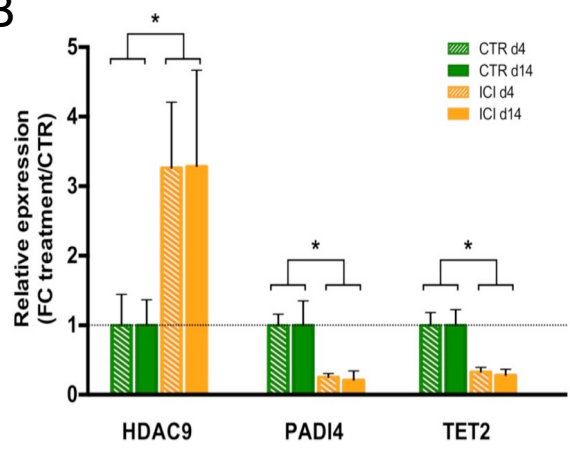**C**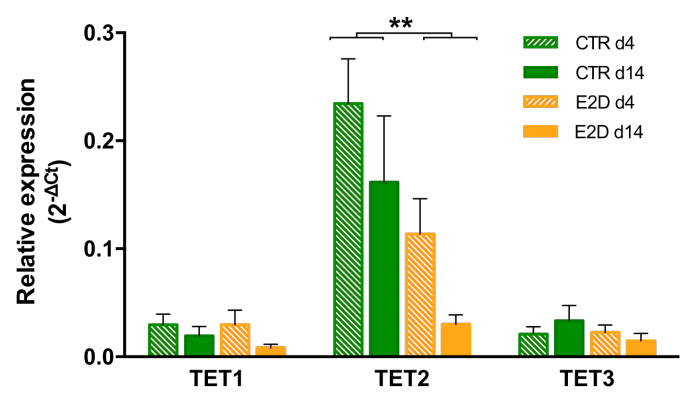**D**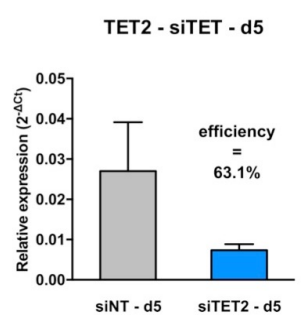**E**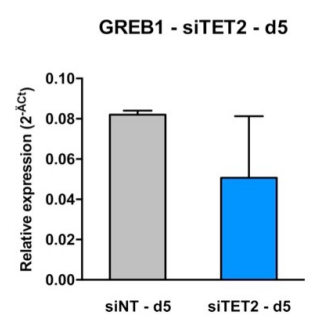**F**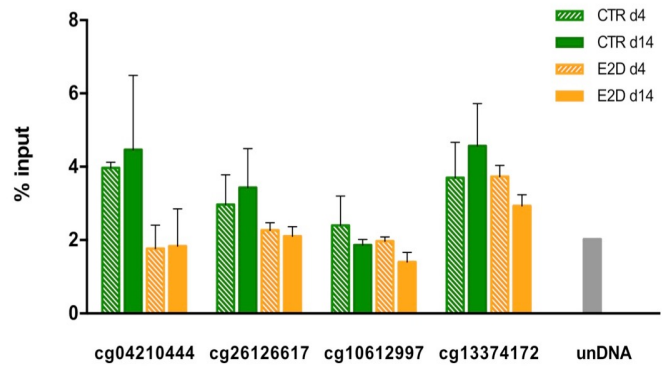

**Supplementary Figure 5. (A)** Pairwise overlap of DEGs and genes that map nearby a DMP (left) or a DB H3K27ac peak (right). Only genes present in both datasets were considered for fold-enrichment. **(B)** Expression of epigenetic remodeling factors HDAC9, PADI4 and TET2 in response to ER-inhibiting ICI treatment (RT-qPCR, Mann-Whitney CTR vs ICI, \* p < 0.01), for 4 and 14 days. Data of ICI treatment are shown as the average of triplicates  $\pm$  SD. **(C)** Expression of TET1, TET2 and TET3 for 4 and 14 days E2D deprivation (RT-qPCR, Mann-Whitney CTR vs E2D, \*\* p < 0.01). Data are shown as the average of triplicates  $\pm$  SD. **(D)** Relative expression of TET2 5 days after transfection with a corresponding siRNA. **(E)** Effect of siTET2 KD on canonical ER target GREB1. Data shown as average  $\pm$  SD of triplicates and was analysed using a t-test (\* p < 0.05). **(F)** Enrichment of 5-hydroxymethylation in CTR and E2D groups at top hyperDMP sites. Unmethylated DNA (unDNA) was spiked in one of the samples as a negative control. Data are shown as the average of biological triplicates  $\pm$  SD.

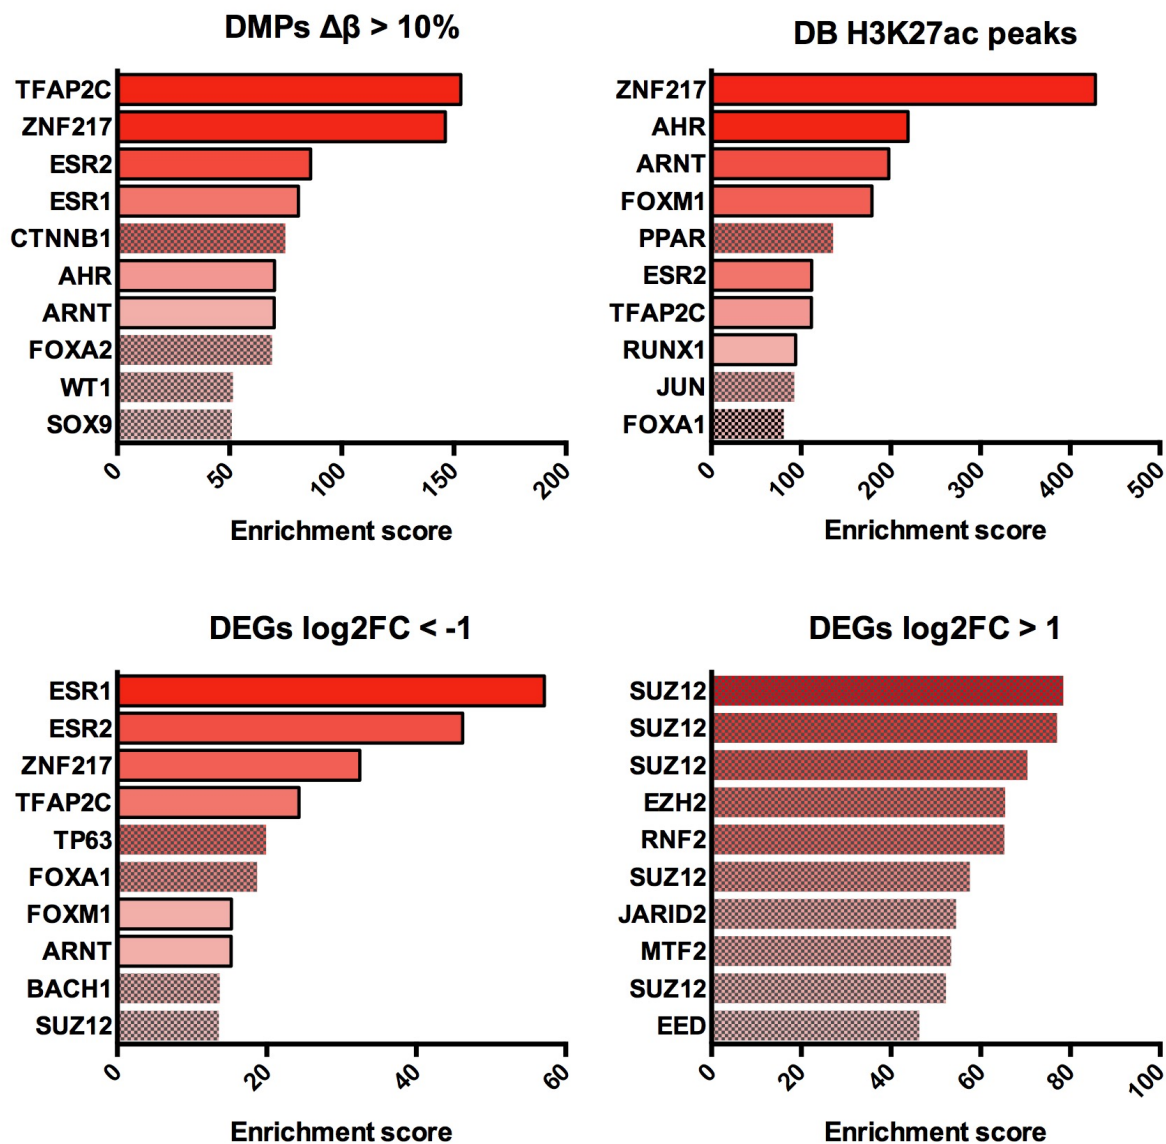

**Supplementary Figure 6.** Enrichment analysis of TF binding across the nearest genes to DMPs ( $\Delta\beta > 10\%$ , FDR  $< 0.05$ ,  $n=829$ ), differentially acetylated histones (FDR  $< 0.05$ ,  $n=834$ ) and down- and upregulated genes ( $\log_2FC < -1$  and  $1$ , FDR  $< 0.05$ ,  $n=381$  and  $n=166$ ). Enrichment score is the combination of  $\log(p\text{-value})$  and Z-score of expected rank (ChEA 2016, EnrichR). Bars surrounded with a black line point out datasets that are originating from MCF-7 cells.



ChIP-seq ER (GSE72249, n=19858) (top 4 hits shown)

| Motif                                                                             | p-value | Enrichment<br>(%observed<br>/%backgr) | Best match<br>(protein<br>family) |
|-----------------------------------------------------------------------------------|---------|---------------------------------------|-----------------------------------|
|   | 1E-1434 | 4.9x<br>(24.9/5.1)                    | ER                                |
|   | 1E-1216 | 2.9x<br>(36.0/12.3)                   | FOX                               |
|  | 1E-1050 | 2.2x<br>(46.5/21.2)                   | MEIS                              |
|   | 1E-420  | 2.8x<br>(15.1/5.4)                    | AP-1                              |

ChIP-seq FOS (GSE105734 n=63027) (top 4 hits shown)

| Motif                                                                             | p-value  | Enrichment<br>(%observed<br>/%backgr) | Best match<br>(protein<br>family) |
|-----------------------------------------------------------------------------------|----------|---------------------------------------|-----------------------------------|
|  | 1E-28640 | 14.5x<br>(66.8/4.5)                   | AP-1                              |
|  | 1E-725   | 1.8x<br>(21.8/13.1)                   | FOX                               |
|  | 1E-264   | 1.6x<br>(13.1/8.3)                    | AP-2γ                             |
|  | 1E-165   | 2.5x<br>(2.5/1.0)                     | ATF (CRE)                         |

ChIP-seq FOXA1 (GSE72249 n=47893) (top 4 hits shown)

| Motif                                                                            | p-value | Enrichment<br>(%observed<br>/%backgr) | Best match<br>(protein<br>family) |
|----------------------------------------------------------------------------------|---------|---------------------------------------|-----------------------------------|
|  | 1E-4908 | 3.0x<br>(50.9/16.9)                   | FOX                               |
|  | 1E-1024 | 3.0x<br>(13.6/4.6)                    | AP-1                              |
|  | 1E-604  | 3.2x<br>(7.4/2.3)                     | GATA                              |
|  | 1E-376  | 1.7x<br>(15.7/9.0)                    | GRHL                              |

ChIP-seq TET2 (GSE153251 n=16842) (top 4 hits shown)

| Motif                                                                             | p-value | Enrichment<br>(%observed<br>/%backgr) | Best match<br>(protein<br>family) |
|-----------------------------------------------------------------------------------|---------|---------------------------------------|-----------------------------------|
|  | 1E-1221 | 3.6x<br>(31.2/8.7)                    | FOX                               |
|  | 1E-1119 | 2.0x<br>(56.7/27.5)                   | NR                                |
|  | 1E-474  | 2.9x<br>(17.5/6.0)                    | AP-1                              |
|  | 1E-291  | 1.3x<br>(25.4/23.7)                   | AP-2γ                             |

ChIP-seq300 (GSE40129 n=23465) (top 4 hits shown)

| Motif                                                                              | p-value | Enrichment<br>(%observed<br>/%backgr) | Best match<br>(protein<br>family) |
|------------------------------------------------------------------------------------|---------|---------------------------------------|-----------------------------------|
|  | 1E-1283 | 2.4x<br>(41.7/17.5)                   | FOX                               |
|  | 1E-1080 | 4.5x<br>(17.3/3.9)                    | AP-1                              |
|  | 1E-719  | 1.7x<br>(49.7/29.5)                   | NR                                |
|  | 1E-345  | 3.2x<br>(8.7/2.7)                     | GATA                              |

ChIP-seq GATA3 (GSE127656 n=56436) (top 4 hits shown)

| Motif                                                                               | p-value | Enrichment<br>(%observed<br>/%backgr) | Best match<br>(protein<br>family) |
|-------------------------------------------------------------------------------------|---------|---------------------------------------|-----------------------------------|
|  | 1E-2506 | 7.4x<br>(11.2/1.5)                    | GATA                              |
|  | 1E-1309 | .9x<br>(31.2/16.1)                    | FOX                               |
|  | 1E-1219 | 3.1x<br>(13.0/4.1)                    | AP-1                              |
|  | 1E-1014 | 4.6x<br>(7.0/1.5)                     | CTCF/Zic                          |

**Supplementary Figure 7.** *De novo* motifs found in regions bound by ER and known cofactors.

A

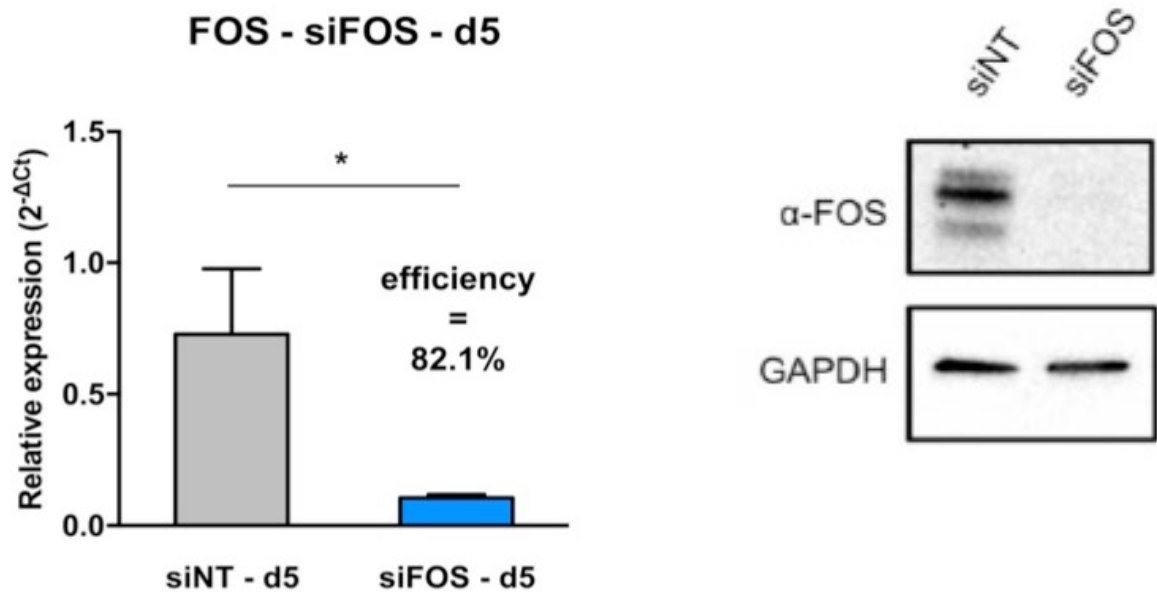

B

| JUN binding       | MCF-7 | Tamoxifen-resistant MCF-7 |
|-------------------|-------|---------------------------|
| DMPs              | 2     | 116                       |
| DB H3K27ac (loss) | 124   | 792                       |
| DB H3K27ac (gain) | 1     | 6                         |

**Supplementary Figure 8. (A)** Relative expression of FOS (left) and protein levels of FOS (right) after 5 days of transfection using a corresponding siRNA. GAPDH is shown for a positive control. **(B)** Overlap of JUN bound regions detected in MCF-7 and tamoxifen-resistant MCF-7 cells (detected by Bi *et al* 2020) with DMPs and DB H3K27ac peaks (detected in E2D cells vs CTR).



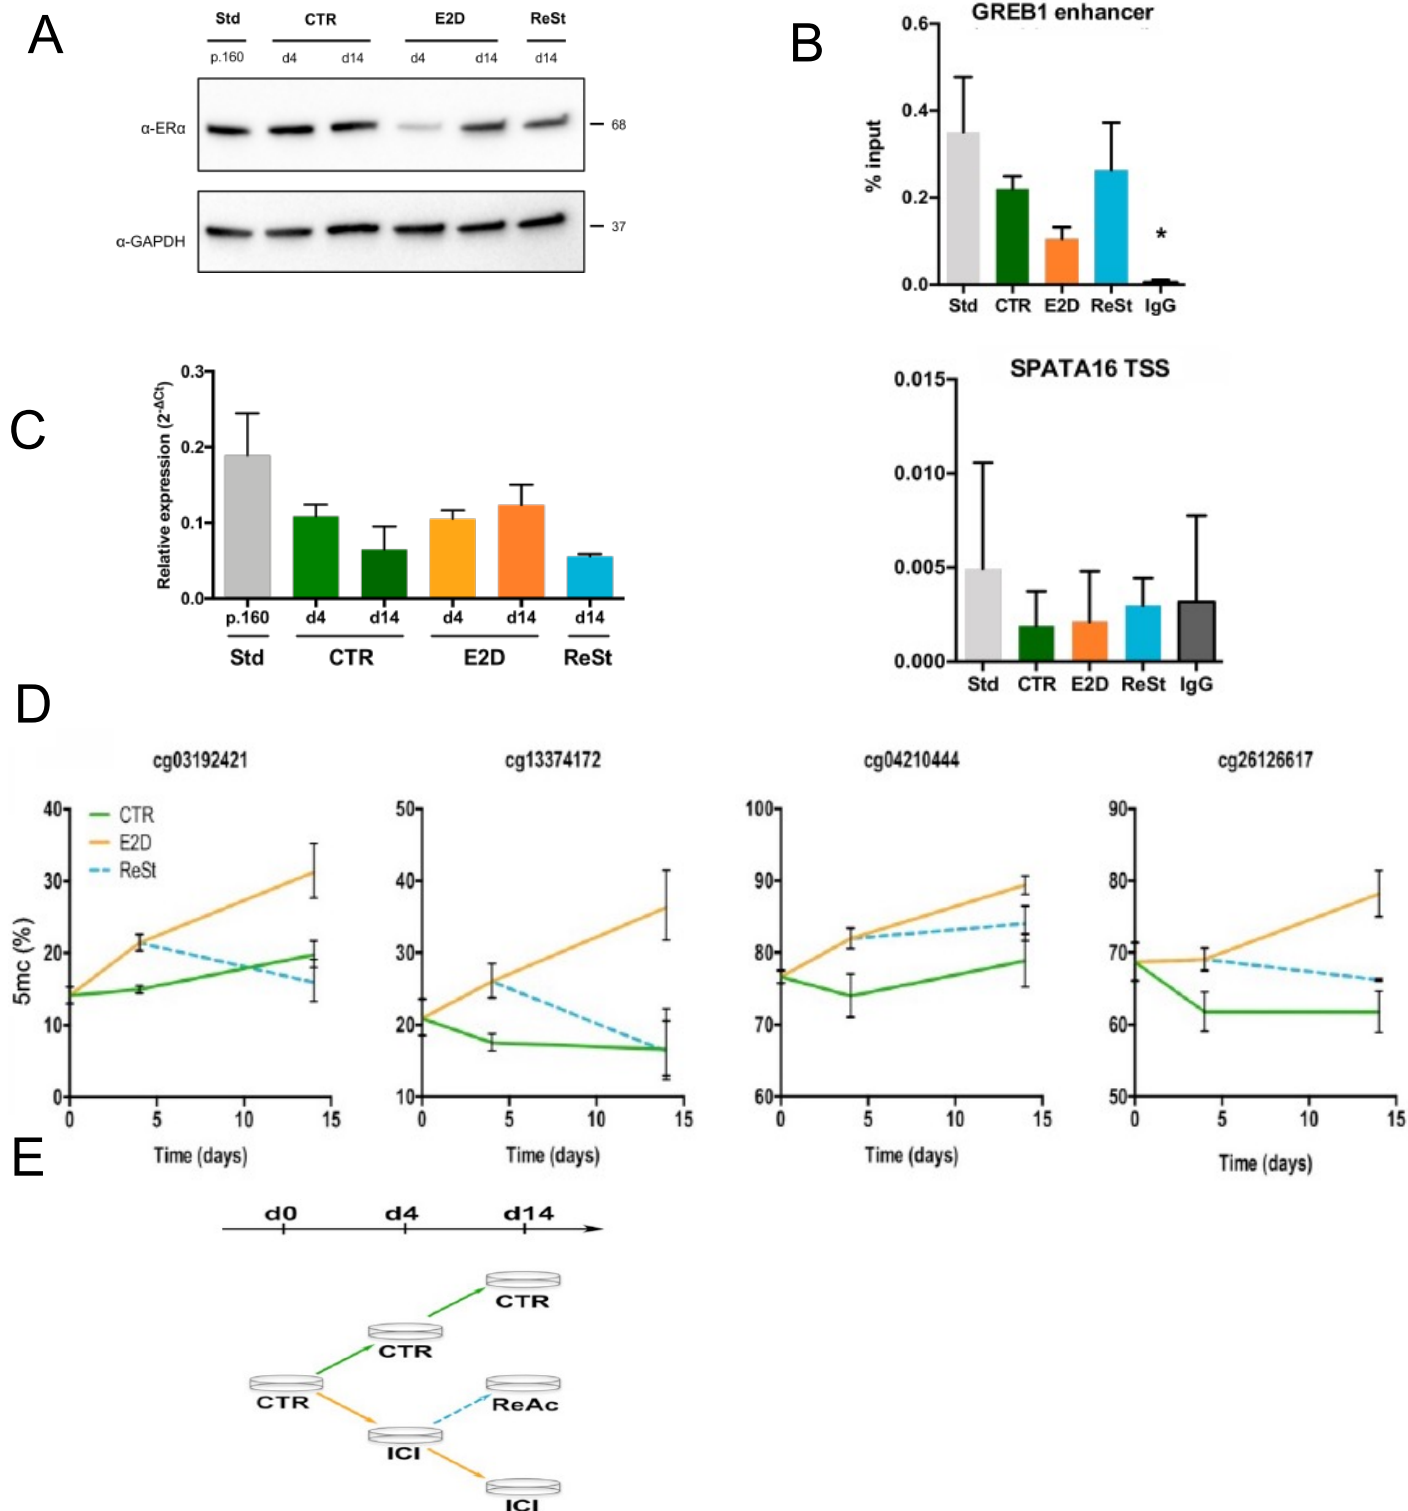

**Supplementary Figure 9.** (A) ER $\alpha$  (ER) protein levels in MCF-7 cells grown in standard medium till passage 160 (Std; phenol-red and complete FBS), in CTR, in E2D and in ReSt conditions. GAPDH was used as an internal control. (B) ER binding levels in GREB1 enhancer (up) and in SPATA16 promoter (down) for the same conditions as in (A) at d14 alone, (n=3). Asterisks indicate significant differences from the IgG (Student's t-test,  $p < 0.05$ ). n.s., not significant (Student's t-test,  $p > 0.05$ ) (C) *ESR1* mRNA expression levels for the same conditions as in (A) (n=3). (D) Technical validation of DNAm levels at top DMPs in CTR, E2D and ReSt (green, orange and blue) by pyrosequencing. (E) MCF-7 cells were treated with 0.1% DMSO for 4 and 14 days (CTR, green), 1 $\mu$ M ICI 182,780 for 4 and 14 days (ICI, orange) and 1 $\mu$ M of ICI 182,780 for 4 days, followed of 10 days without the inhibitor (ReAc, blue).

A

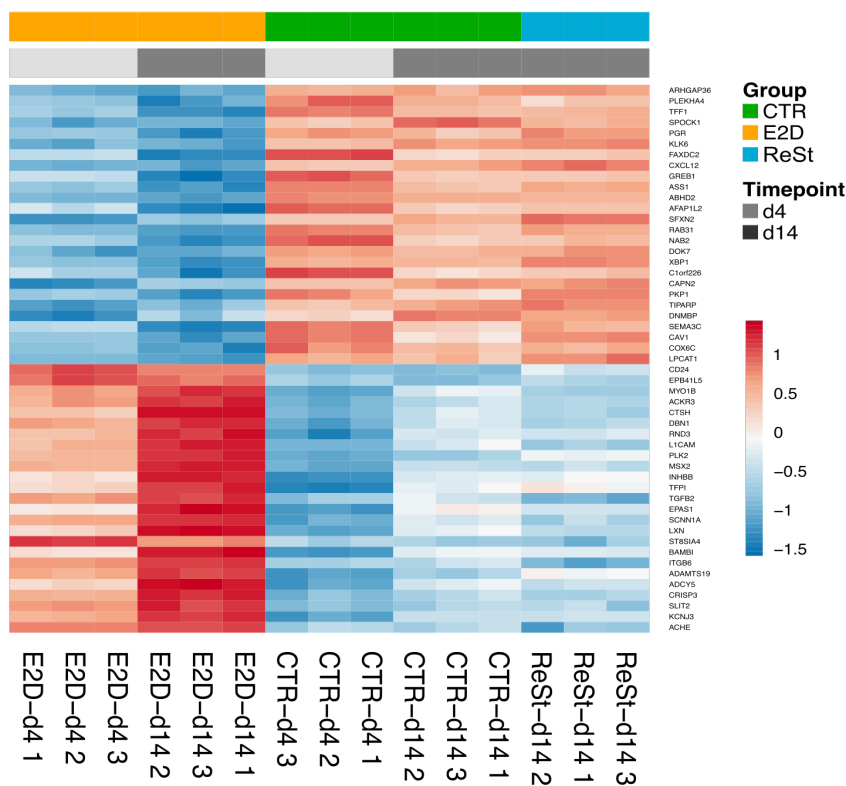

B

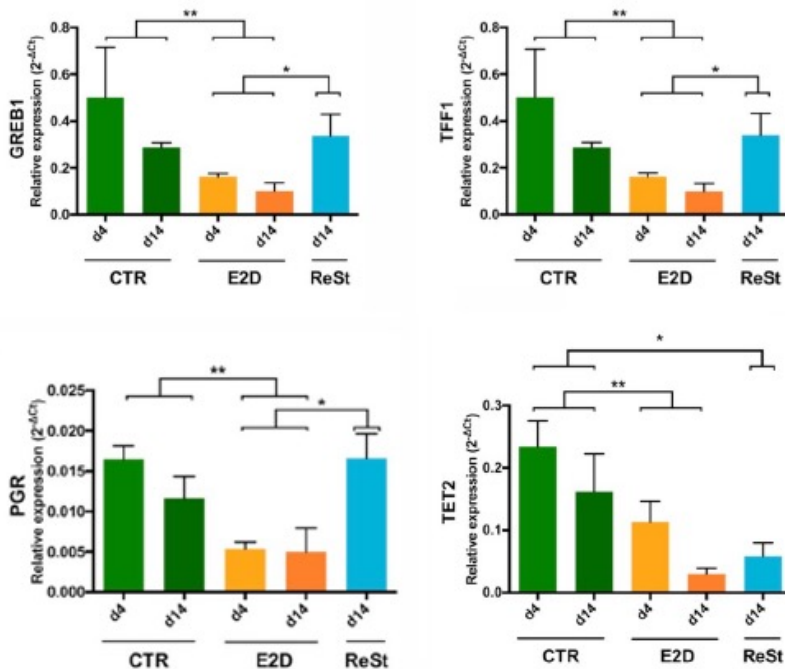

C

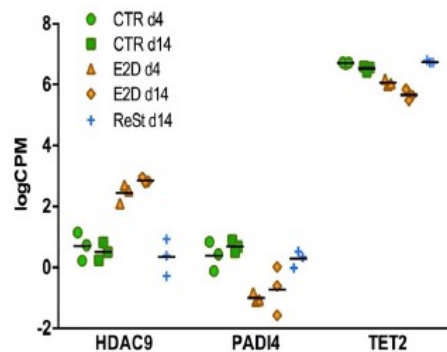

D

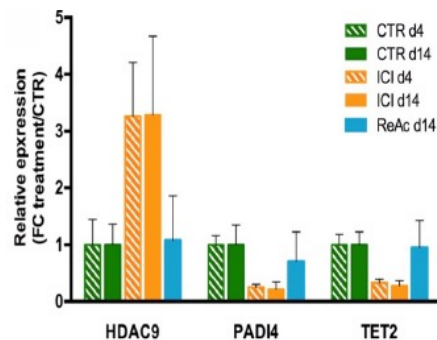

**Supplementary Figure 10. (A)** Top 50 differentially expressed genes (FDR < 0.05) between CTR, E2D and ReSt. **(B)** Technical validation of ER targets and TET2 by RT-qPCR. The effect of treatment was tested using a Mann-Whitney test (\* p < 0.05; \*\* p < 0.01). Results are shown as the average of triplicates ± SD. **(C)** Expression of epigenetic remodeling factors HDAC9, PADI4 and TET2 in response to E2 deprivation and re-stimulation (RNA-seq, FDR < 0.05). **(D)** Expression of epigenetic remodeling factors HDAC9, PADI4 and TET2 in response to ER-inhibiting ICI treatment (RT-qPCR), for 4 and 14 days and to 4 days of ICI followed by 10 days of re-activation (ReAc). Data of ICI treatment are shown as the average of triplicates ± SD.

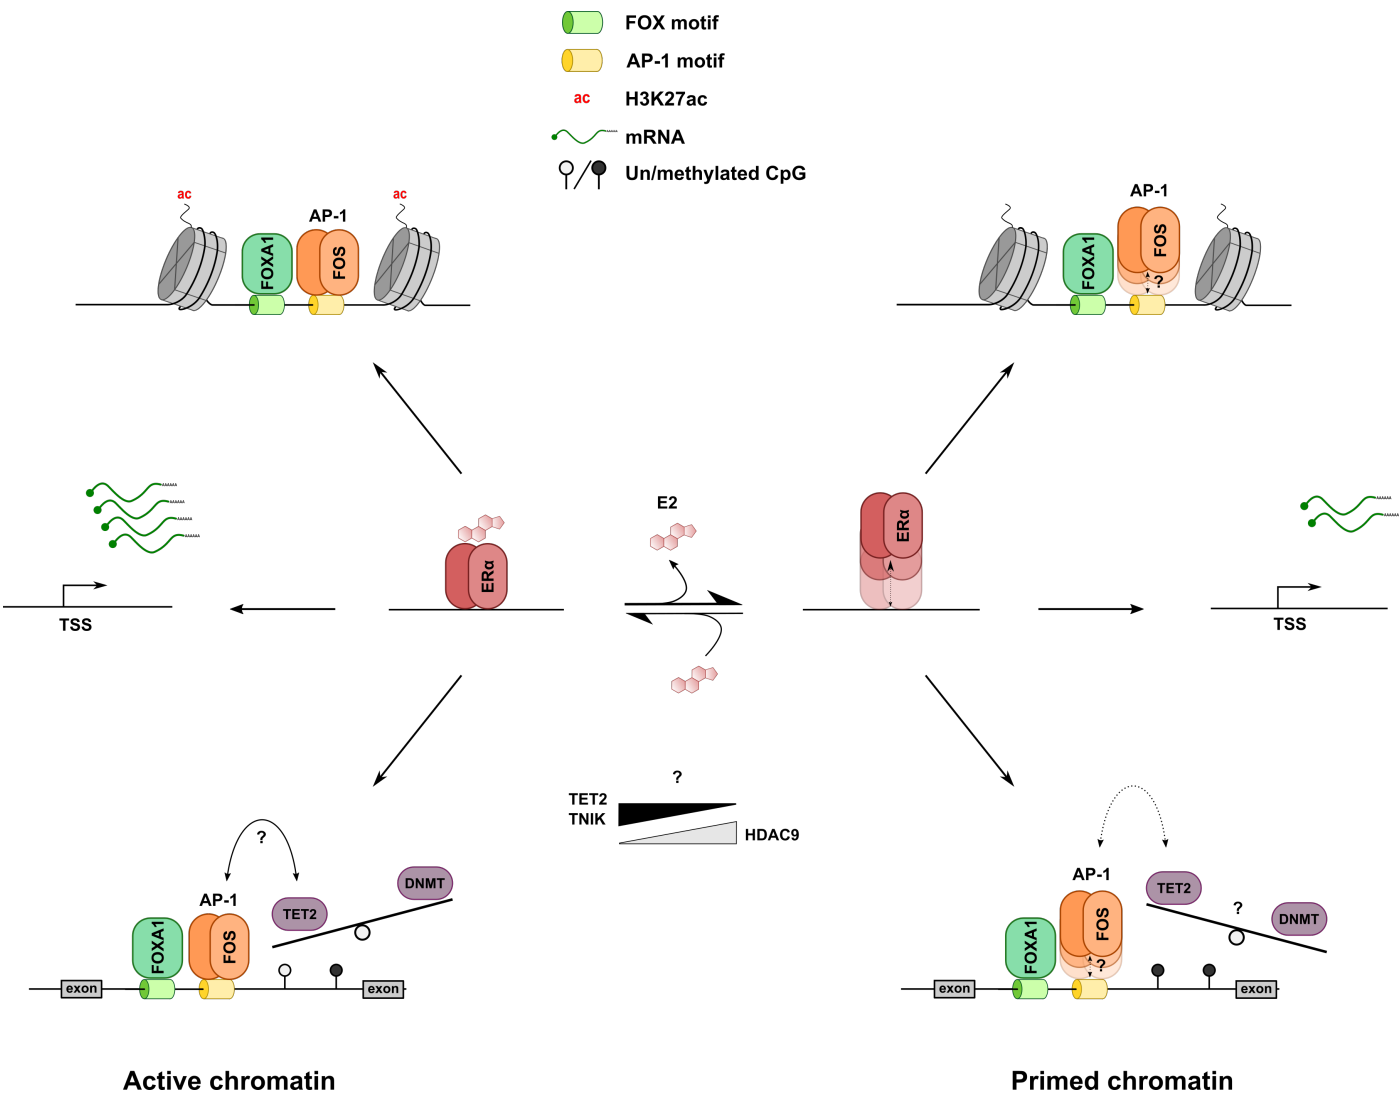

**Supplementary Figure 11.** Shift from active to primed chromatin state in response to E2 deprivation and re-stimulation. Mechanistic model by which the reduction of ligand-dependent ER activity leads to an AP-1 and FOXA1 mediated increase of DNAm and decrease of H3K27ac and transcription. The reversibility of these changes is partial. This model integrates current findings to prior knowledge of ER-dependent chromatin and TF interactions.

**Supplementary table 1. Primer sequences to measure DNA methylation by pyrosequencing. Primers carrying a BIO at their 5' contain "BIO" in their name**

| Primer           | Sequence                         | Sequencing primer   | Genomic range               | Amplicon (bp) | Annealing Temp (°C) |
|------------------|----------------------------------|---------------------|-----------------------------|---------------|---------------------|
| cg12667152_F     | AGTTATGATGGGG<br>TGGAGAAA        | Same as forward     | chr11:85,884,137-85,884,246 | 110           | <55.8               |
| cg12667152_BIO_R | AAAATCCCTACTAA<br>TCCACACAAA     |                     |                             |               |                     |
| cg10612997_F     | TGTGTTATTGATGA<br>AGTTTTGAG      | TTAGGGGAGA<br>ATATG | chr2:11,673,902-11,674,119  | 218           | 61                  |
| cg10612997_BIO_R | ACTAAAATCTACAC<br>ACCATACTCTCC   |                     |                             |               |                     |
| cg03192421_F     | AGGATTGTGAATAT<br>TATGTTATTGTG   | GTTTATAATGG<br>TAAT | chr20:10,643,103-10,643,295 | 193           | 56                  |
| cg03192421_BIO_R | CAAACCAAATCAA<br>CCTCAA          |                     |                             |               |                     |
| cg04210444_F     | GTTTGTGTGAATA<br>GAGGTTTTAGG     | Same as forward     | chr20:46,397,276-46,397,410 | 135           | 56                  |
| cg04210444_BIO_R | CACACTACCTTCTC<br>TTATCAATTATCA  |                     |                             |               |                     |
| cg17407893_BIO_F | GTGGTATTTGGGA<br>ATTTGTTG        | GTAATTTGTGT<br>TTTA | chr16:16,119,175-16,119,303 | 129           | 61                  |
| cg17407893_R     | CAAAAACCCTCCC<br>ACTAAATT        |                     |                             |               |                     |
| cg13670878_BIO_F | AGTGGATGGTAAG<br>TGAGAGG         | TATTTAAAATT<br>AAC  | chr2:11,681,555-11,681,896  | 342           | 58                  |
| cg13670878_R     | CAACCTAAACCCT<br>ACTAAAATATTTA   |                     |                             |               |                     |
| cg13374172_F     | TATGTTTGAGTTAG<br>TAAGAGGGG      | Same as forward     | chr8:56,860,886-56,861,092  | 207           | 56                  |
| cg13374172_BIO_R | CCCATACATAATAC<br>TTAAAATATCACTT |                     |                             |               |                     |
| cg26126617_F     | GTTTTGGATTAAT<br>AGAGGAGTATTTG   | Same as forward     | chr2:25,077,082-25,077,220  | 139           | 56                  |
| cg26126617_BIO_R | CCAAAACCCCTAA<br>ATAATATAACCAC   |                     |                             |               |                     |

**Supplementary table 2. Primer sequences to measure histone mark enrichment by qPCR**

| Primer        | Sequence                    | Amplicon (bp) | Source                     |
|---------------|-----------------------------|---------------|----------------------------|
| Peak1_F       | GCTTGCAGGCAGAAATGTAAACAC    | 136           | designed in this study     |
| Peak1_R       | CTGTTGCCCTAAGCCTGTATT       |               |                            |
| Peak2_F       | GTTGTGTGGACCATATTTTCTAAAC   | 102           | designed in this study     |
| Peak2_R       | TGTTTACATTTCTGCCTGCA        |               |                            |
| Peak3_F       | TTAAACAGTTCTCCTCCACTCC      | 74            | designed in this study     |
| Peak3_R       | GCAGATTACAAAACACTCACTGAAGAC |               |                            |
| Peak4_F       | TGATGTGTCAGGAACCCTCC        | 92            | designed in this study     |
| Peak4_R       | CCCAGACCTACTGCATCAGAAAC     |               |                            |
| GREB1_pos_F   | CACGTCCCCACCTCACTG          | 56            | Jozwik, 2016, Cell Reports |
| GREB1_pos_R   | TGTTTCAGCTTCGGGACACC        |               |                            |
| SPATA16_neg_F | GACGCCAGGACTTGAAAC          | 102           | designed in this study     |
| SPATA16_neg_R | TCAAGTGCAACTCAAGAGGA        |               |                            |

**Supplementary table 3. Primer sequences to measure gene expression**

| Primer      | Sequence                | Amplicon (bp) | Source                   |
|-------------|-------------------------|---------------|--------------------------|
| qRT_GREB1_F | ATGGGAAATTCTTACGCTGGAC  | 171           | designed in this study   |
| qRT_GREB1_R | CACTCGGCTACCACCTTCT     |               |                          |
| qRT_TFF1_F  | TCGAAACAGCAGCCCTTATT    | 102           | designed in this study   |
| qRT_TFF1_R  | GGCCCAGACAGAGACGTGTA    |               |                          |
| qRT_PGR_F   | TTATGGTGTCTTACCTGTGGG   | 112           | designed in this study   |
| qRT_PGR_R   | GCGGATTTTATCAACGATGCAG  |               |                          |
| qRT_FOS_F   | AAGCGGAGACAGACCAACTA    | 134           | designed in this study   |
| qRT_FOS_R   | CAGGTCATCAGGGATCTTG     |               |                          |
| qRT_JUN_F   | AACAGGTGGCACAGCTTAAAC   | 77            | PrimerBank ID 44890066c2 |
| qRT_JUN_R   | CAACTGCTGCGTTAGCATGAG   |               |                          |
| qRT_HDAC9_F | AGTAGAGAGGCATCGCAGAGA   | 141           | PrimerBank 116284378c1   |
| qRT_HDAC9_R | GGAGTGTCTTTCGTTGCTGAT   |               |                          |
| qRT_PADI4_F | CAGGGGACATTGATCCGTGTG   | 130           | PrimerBank 216548486c1   |
| qRT_PADI4_R | GGGAGGCGTTGATGCTGAA     |               |                          |
| qRT_MMP13_F | ATTTCTCGGAGCCTCTCAGT    | 103           | designed in this study   |
| qRT_MMP13_R | AGTTTGCAGAGCGCTACCT     |               |                          |
| qRT_RPLP0_F | TGGCAGCATCTACAACCCTGAA  | 90            | designed in this study   |
| qRT_RPLP0_R | AACTGGCAACATTGCGGACA    |               |                          |
| qRT_TNIK_F  | TAAGGGTCGTCATGTCAAACCG  | 173           | PrimerBank 239735578c1   |
| qRT_TNIK_R  | CCATGCCTGGTGGGTTCTTT    |               |                          |
| qRT_TET2_F  | CTTTCCTCCCTGGAGAACAGCTC | 146           | designed in this study   |
| qRT_TET2_R  | TGCTGGGACTGCTGCATGACT   |               |                          |

**Supplementary table 4. List of published ChIP-seq datasets produced in MCF-7**

| GEO series | Target   | Format     | Year | Reference                                                                                                                                                                                                                      |
|------------|----------|------------|------|--------------------------------------------------------------------------------------------------------------------------------------------------------------------------------------------------------------------------------|
| GSE75070   | RUNX1    | bed        | 2016 | Barutcu AR, Hong D, Lajoie BR, McCord RP et al. RUNX1 contributes to higher-order chromatin organization and gene regulation in breast cancer cells. <i>Biochim Biophys Acta</i> 2016 Nov;1859 (11):1389-1397. PMID: 27514584  |
| GSE96352   | H3K27ac  | bed        | 2017 | ENCODE Project Consortium. An integrated encyclopedia of DNA elements in the human genome. <i>Nature</i> 2012 Sep 6;489 (7414):57-74. PMID: 22955616                                                                           |
| GSE96363   | H3K27me3 | bed        | 2017 | ENCODE Project Consortium. An integrated encyclopedia of DNA elements in the human genome. <i>Nature</i> 2012 Sep 6;489 (7414):57-74. PMID: 22955616                                                                           |
| GSE31477   | ZNF217   | bed        | 2012 | ENCODE Project Consortium. An integrated encyclopedia of DNA elements in the human genome. <i>Nature</i> 2012 Sep 6;489 (7414):57-74. PMID: 22955616                                                                           |
| GSE105734  | FOS      | bed;<br>bw | 2017 | ENCODE Project Consortium. An integrated encyclopedia of DNA elements in the human genome. <i>Nature</i> 2012 Sep 6;489 (7414):57-74. PMID: 22955616                                                                           |
| GSE91550   | JUN      | bed        | 2017 | ENCODE Project Consortium. An integrated encyclopedia of DNA elements in the human genome. <i>Nature</i> 2012 Sep 6;489 (7414):57-74. PMID: 22955616                                                                           |
| GSE32465   | JUND     | bed        | 2017 | ENCODE Project Consortium. An integrated encyclopedia of DNA elements in the human genome. <i>Nature</i> 2012 Sep 6;489 (7414):57-74. PMID: 22955616                                                                           |
| GSE127656  | GATA3    | bed        | 2016 | ENCODE Project Consortium. An integrated encyclopedia of DNA elements in the human genome. <i>Nature</i> 2012 Sep 6;489 (7414):57-74. PMID: 22955616                                                                           |
| GSE106068  | CREB1    | bed        | 2017 | ENCODE Project Consortium. An integrated encyclopedia of DNA elements in the human genome. <i>Nature</i> 2012 Sep 6;489 (7414):57-74. PMID: 22955616                                                                           |
| GSE91415   | CUX1     | bed        | 2017 | ENCODE Project Consortium. An integrated encyclopedia of DNA elements in the human genome. <i>Nature</i> 2012 Sep 6;489 (7414):57-74. PMID: 22955616                                                                           |
| GSE106025  | ATF-7    | bed        | 2017 | ENCODE Project Consortium. An integrated encyclopedia of DNA elements in the human genome. <i>Nature</i> 2012 Sep 6;489 (7414):57-74. PMID: 22955616                                                                           |
| GSE105740  | NCOA3    | bed        | 2017 | ENCODE Project Consortium. An integrated encyclopedia of DNA elements in the human genome. <i>Nature</i> 2012 Sep 6;489 (7414):57-74. PMID: 22955616                                                                           |
| GSE32465   | HDAC2    | bed        | 2012 | ENCODE Project Consortium. An integrated encyclopedia of DNA elements in the human genome. <i>Nature</i> 2012 Sep 6;489 (7414):57-74. PMID: 22955616                                                                           |
| GSE32465   | FOSL2    | bed        | 2012 | ENCODE Project Consortium. An integrated encyclopedia of DNA elements in the human genome. <i>Nature</i> 2012 Sep 6;489 (7414):57-74. PMID: 22955616                                                                           |
| GSE85106   | CTCF     | bed        | 2016 | Fiorito E, Sharma Y, Gilfillan S, Wang S et al. CTCF modulates Estrogen Receptor function through specific chromatin and nuclear matrix interactions. <i>Nucleic Acids Res</i> 2016 Dec 15;44 (22):10588-10602. PMID: 27638884 |
| GSE81714   | H3K4me1  | bed        | 2016 | Jozwik KM, Chernukhin I, Serandour AA, Nagarajan S et al. FOXA1 Directs H3K4 Monomethylation at Enhancers via Recruitment of the Methyltransferase MLL3. <i>Cell Rep</i> (10):2715-2723. PMID: 279268732016 Dec 6;17           |
| GSE81714   | H3K4me3  | bed        | 2016 | Jozwik KM, Chernukhin I, Serandour AA, Nagarajan S et al. FOXA1 Directs H3K4 Monomethylation at Enhancers via Recruitment of the Methyltransferase MLL3. <i>Cell Rep</i> (10):2715-2723. PMID: 279268732016 Dec 6;17           |
| GSE40767   | FOX M1   | bed        | 2013 | Sanders DA, Ross-Innes CS, Beraldi D, Carroll JS et al. Genome-wide mapping of FOXM1 binding reveals co-binding with estrogen receptor alpha in breast cancer cells. (1):R6. PMID: 23347430 <i>Genome Biol</i> 2013 Jan 24;14  |
| GSE71327   | RACK7    | bed        | 2016 | Shen H, Xu W, Guo R, Rong B et al. Suppression of Enhancer Overactivation by a RACK7-Histone Demethylase Complex. <i>Cell</i> 2016 Apr 7;165 (2):331-42. PMID: 27058665                                                        |

|           |                            |            |      |                                                                                                                                                                                                                                                                                                                                                                                                                                                                                                                                            |
|-----------|----------------------------|------------|------|--------------------------------------------------------------------------------------------------------------------------------------------------------------------------------------------------------------------------------------------------------------------------------------------------------------------------------------------------------------------------------------------------------------------------------------------------------------------------------------------------------------------------------------------|
| GSE72249  | FOXA1                      | bed;<br>bw | 2016 | Swinstead EE, Miranda TB, Paakinaho V, Baek S et al. Steroid Receptors Reprogram FoxA1 Occupancy through Dynamic Chromatin Transitions. <i>Cell</i> 2016 Apr 21;165 (3):593-605. PMID: 27062924                                                                                                                                                                                                                                                                                                                                            |
| GSE72249  | ER                         | bed;<br>bw | 2016 | Swinstead EE, Miranda TB, Paakinaho V, Baek S et al. Steroid Receptors Reprogram FoxA1 Occupancy through Dynamic Chromatin Transitions. <i>Cell</i> 2016 Apr 21;165 (3):593-605. PMID: 27062924                                                                                                                                                                                                                                                                                                                                            |
| GSE23852  | TFAP2C<br>(AP-2 $\gamma$ ) | bed        | 2011 | Tan SK, Lin ZH, Chang CW, Varang V et al. AP-2 $\gamma$ regulates oestrogen receptor-mediated long-range chromatin interaction and gene transcription. <i>EMBO J</i> 2011 May 13;30 (13):2569-81. PMID: 21572391                                                                                                                                                                                                                                                                                                                           |
| GSE40129  | p300                       | bed        | 2012 | Theodorou V, Stark R, Menon S, Carroll JS. GATA3 acts upstream of FOXA1 in mediating ESR1 binding by shaping enhancer accessibility. <i>Genome Res</i> 2013 Jan;23 (1):12-22. PMID: 23172872                                                                                                                                                                                                                                                                                                                                               |
| GSE90550  | AHR                        | bed        | 2018 | Yang SY, Ahmed S, Satheesh SV, Matthews J. Genome-wide mapping and analysis of aryl hydrocarbon receptor (AHR)- and aryl hydrocarbon receptor repressor (AHRR)-binding sites in human breast cancer cells. <i>Arch Toxicol</i> 2018 Jan;92 (1):225-240. PMID: 28681081                                                                                                                                                                                                                                                                     |
| GSE128460 | JUN                        | bed<br>bw  | 2020 | Mingjun Bi, Zhao Zhang, Yi-Zhou Jiang, Pengya Xue, Hu Wang, Zhao Lai, Xiaoyong Fu, Carmine De Angelis, Yue Gong, Zhen Gao, Jianhua Ruan, Victor X. Jin, Elisabetta Marangoni, Elodie Montaudon, Christopher K. Glass, Wei Li, Tim Hui-Ming Huang, Zhi-Ming Shao, Rachel Schiff, Lizhen Chen & Zhijie Liu. Enhancer reprogramming driven by high-order assemblies of transcription factors promotes phenotypic plasticity and breast cancer endocrine resistance. <i>Nature Cell Biology</i> volume 22, pages701–715 (2020). PMID: 32424275 |



**Supplementary table 5.** ER, AP-1 and FOXA-1 motif occurrence within ER binding sites (n=19858, ChIP-seq GSE72249 (Swinstead et al 2016))

| <b>Genomic feature</b> | <b>Count of ER motif</b> | <b>Count of AP-1 motif</b> | <b>Count of FOXA1 motif</b> |
|------------------------|--------------------------|----------------------------|-----------------------------|
| 3' UTR                 | 120                      | 112                        | 213                         |
| 5' UTR                 | 69                       | 55                         | 86                          |
| Distal Intergenic      | 2598                     | 3887                       | 6613                        |
| Downstream             | 52                       | 70                         | 96                          |
| Exon                   | 261                      | 289                        | 452                         |
| Intron                 | 2446                     | 3336                       | 5725                        |
| Promoter               | 240                      | 259                        | 347                         |
| <b>Grand Total</b>     | <b>5786</b>              | <b>8008</b>                | <b>13532</b>                |
